# Supplementary material
Source: Springer Nature journal article supplement (https://www.springermedizin.de/resource/supplementary/13058_2011_2734_MOESM3_ESM.pdf/9702452)

**A** Pimonidazole

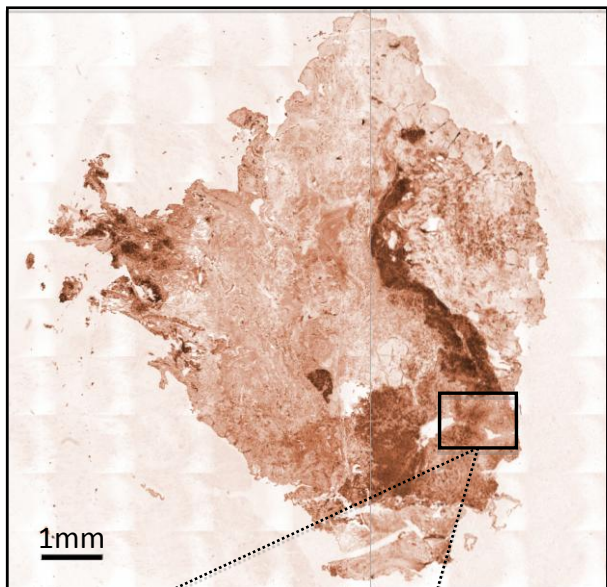

**B** TRIB3

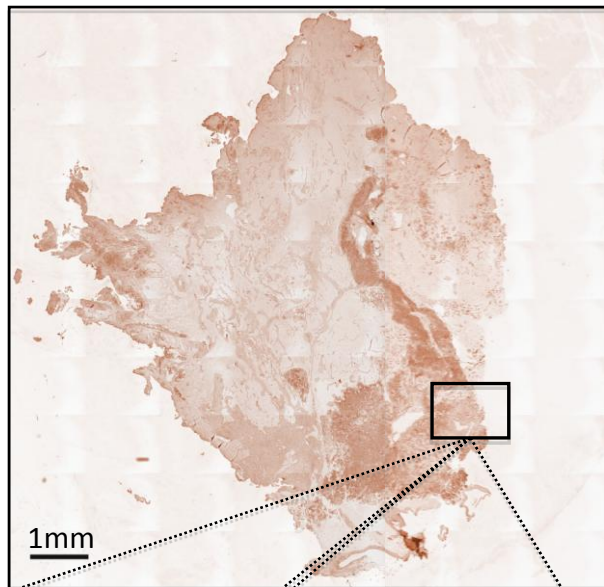

**C** pimonidazole

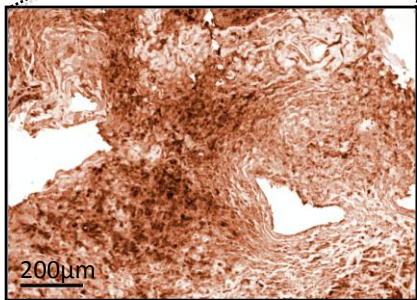

**D** TRIB3

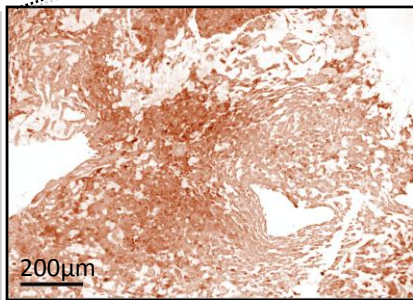

**E** hematoxylin

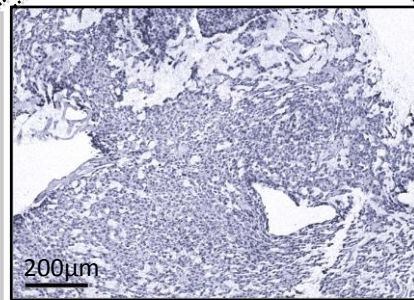

Supplement: MOESM3 [file 9702452]
